# Supplementary material for: Cell Identity Switching Regulated by Retinoic Acid Signaling Maintains Homogeneous Segments in the Hindbrain
Source: PubMed Central journal article supplement (PMC5988564; doi:10.1016/j.devcel.2018.04.003), 2018-06-04
Supplement: mmc1.pdf [file mmc1.pdf]

**Developmental Cell, Volume 45**

**Supplemental Information**

**Cell Identity Switching Regulated**

**by Retinoic Acid Signaling**

**Maintains Homogeneous Segments in the Hindbrain**

**Megan Addison, Qiling Xu, Jordi Cayuso, and David G. Wilkinson**

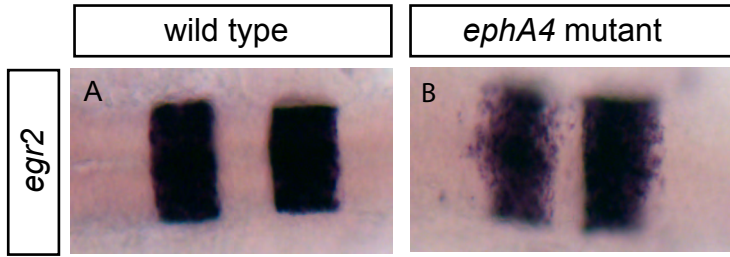

**Figure S1, related to Figure 3. Analysis of *ephA4* mutant embryos**

(A, B): An *ephA4* mutant has disrupted sharpening of the r2/r3, r3/r4 and r5/r6 borders. MO-mediated knockdown disrupts *ephA4* function since the same phenotype occurs in *ephA4* morphant embryos (Cooke et al., 2005; Terriente et al., 2012).

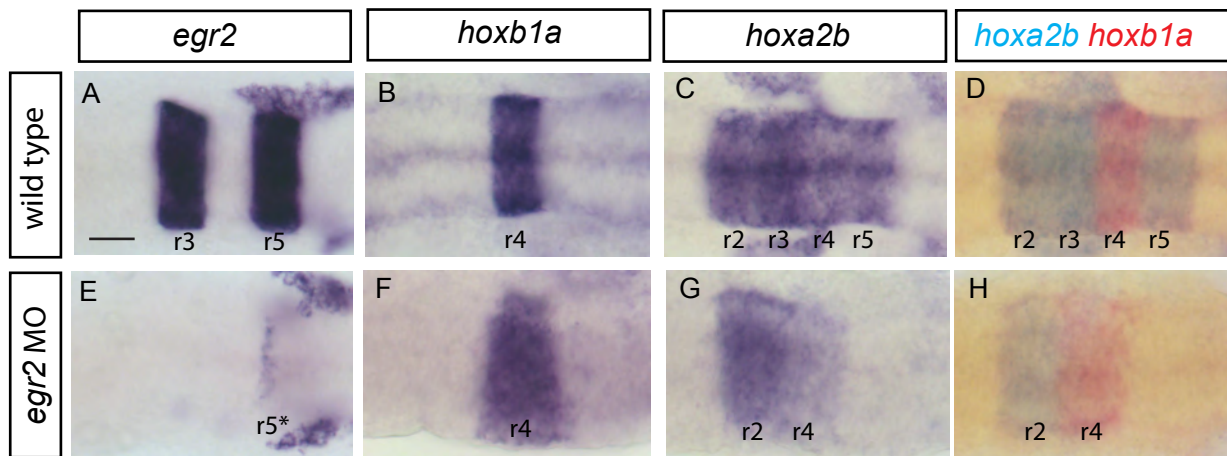

**Figure S2, related to Figure 4. Analysis of *egr2* knockdown embryos**

(A-H): Knockdown of *egr2a* and *egr2b* results in loss of *egr2b* expression in r3 and severe reduction of expression in r5\* at 17 hpf (E) compared to control embryos (A). Following loss of r3 territory, the flanking segments still express *hox* genes that mark r2 (*hoxa2*) and r4 (*hoxb1* plus *hoxa2*): compare controls (B-D) with *egr2* knockdown embryos (F-H). A-C and E-G are single in situ hybridizations, and D, H are double in situ hybridizations, as indicated. Scale bar: 50  $\mu$ m.

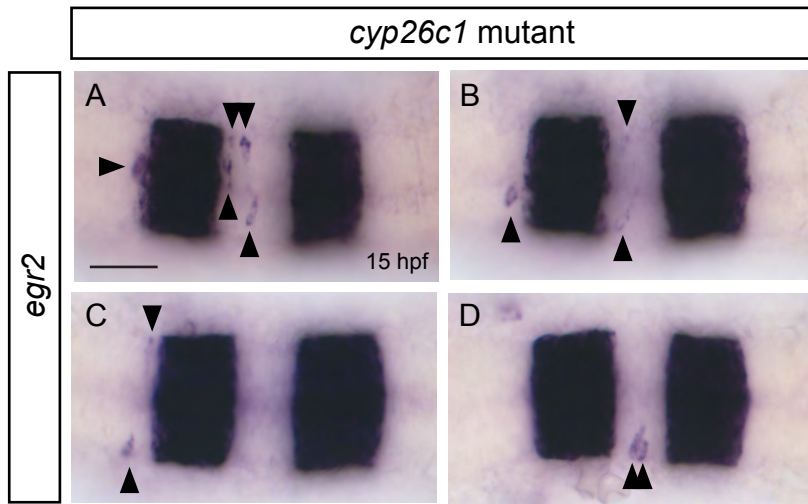

**Figure S3, related to Figure 6A-E. *cyp26c1* mutant embryos have ectopic *egr2*-expressing cells (A-D):** Expression of *egr2* was analyzed in *cyp26c1* mutant embryos. Ectopic *egr2*-expressing cells were observed in r2 and r4 (arrowheads), as seen in morphants (Fig.6B). That this phenotype occurs following inactivation of *cyp26c1* alone suggests that RA levels in r2 and r4 are altered sufficiently to disrupt identity switching. Scale bar: 50  $\mu$ m.

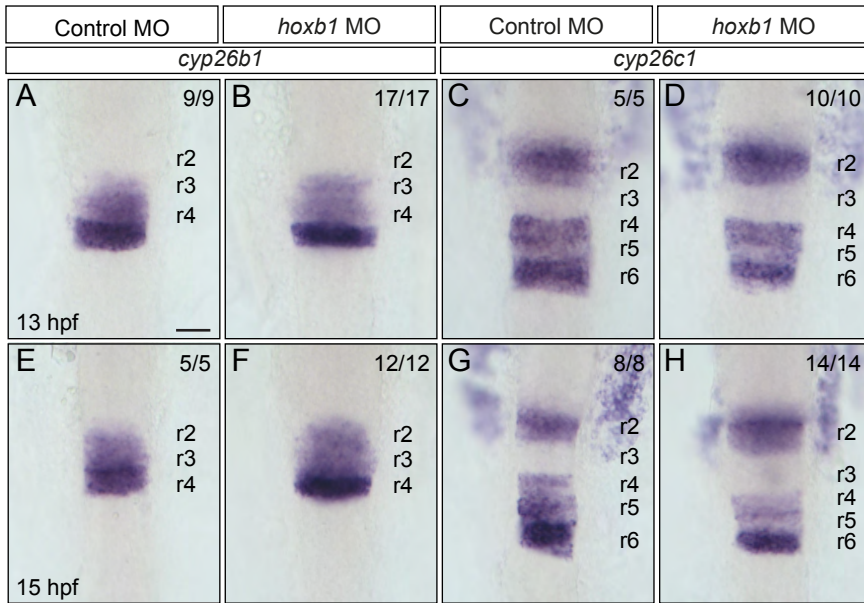

**Figure S4, related to Figure 6F-H. *hoxb1* knockdown does not alter *cyp26b1* or *cyp26c1* expression** (A-H): *hoxb1a* and *hoxb1b* were knocked down and expression of *cyp26b1* and *cyp26c1* analyzed. While knockdown of *hoxb1* increases the size of r3 at the expense of r4, *cyp26b1* is still highly expressed in r4 at 13 hpf (B) and 15 hpf (E), as in control embryos (A, E). Similarly, *cyp26c1* is still expressed in r4 of *hoxb1* morphants at 13 hpf (D) and 15 hpf (H), as in control embryos (C, G). Embryos in are flat-mounted with anterior to the top. Scale bars: 50  $\mu$ m.

**Table S1. Related to STAR Methods section. Oligonucleotides used in the paper**

**Cloning oligos**

| Name              | Sequence 5'-3'                                                                                            | Target                       |
|-------------------|-----------------------------------------------------------------------------------------------------------|------------------------------|
| egr2b-attB F      | GGGGACAAGTTTGTACAAAAAAGCAGGCTGGACTTCACGATGACAGCTAAAACTTTG                                                 | egr2b for Gateway pME        |
| egr2b-attB R      | GGGGACCACTTTGTACAAGAAAGCTGGGTGGTTTGAAGTGGACGAGCAGATGC                                                     | egr2b for Gateway pME        |
| egr2b-Myc Amp F   | GATCGTCGACGCTGGACTTCACGATGACA                                                                             | egr2b-Myc for CNE1:egr2b-Myc |
| egr2b-Myc Amp R   | GGATCATCATCGATGGTAC                                                                                       | egr2b-Myc for CNE1:egr2b-Myc |
| mBait insertion F | AGCGCGGCTGCTGCGGTTCCAGAGGTGGATCGATCTCGAGAAGCTTGACGT                                                       | annealed                     |
| mBait insertion R | CAAGCTTCTCGAGATCGATCCACCTCTGGAACCGCAGCAGCCGCGCT                                                           | annealed                     |
| H2B-Citrine-pA F  | GATCAAGCTTCTGCAGTCGACGGTACCGCCACC                                                                         | H2B-Citrine-polyA            |
| H2B-Citrine-pA R  | CGCCGCGCCGCGAATTA AAAAACCTCCACAC                                                                          | H2B-Citrine-polyA            |
| cFos insertion F  | CGATCCAGTGACGTAGGAAGTCCATCCATTCACAGCGCTTCTATAAAGGCCAGCTGA<br>GGCGCCTACTACTCCAACCGGACTGCAGCGAGCAACTA       | annealed                     |
| cFos insertion R  | AGCTTAGTTGCTCGCTGCAGTCGCGGTTGGAGTAGTAGGCGCCTCAGCTGGCGCCTTTATAGA<br>AGCGCTGTGAATGGATGGACTTCCTACGCTCACTGGAT | annealed                     |

**Morpholinos**

| Name                | Sequence 5'-3'            | Target  | Reference                 | Dose          |
|---------------------|---------------------------|---------|---------------------------|---------------|
| Standard control MO | CCTCTTACCTCAGTTACAATTTATA |         |                           | 4-5 ng/embryo |
| p53 MO              | GCGCCATTGCTTTGCAAGAATTG   | p53     | Langheinrich et al., 2002 | 4 ng/embryo   |
| egr2b MO            | AGTTTTAGCTGTATCGTGAAGTCC  | egr2b   | this study                | 4 ng/embryo   |
| egr2a MO            | CATGTGCTCCATGTTGGGAAGATTT | egr2a   | this study                | 4 ng/embryo   |
| ephA4 MO            | AACACAAGCGCAGCCATTGGTGTC  | ephA4   | Cooke et al., 2005        | 5 ng/embryo   |
| cyp26b1 MO          | CTCGAAGAGCATGGCTGTGAACGTC | cyp26b1 | Hernandez et al., 2007    | 4 ng/embryo   |

|            |                           |
|------------|---------------------------|
| cyp26c1 MO | AAACTCGGTTATCCTCACCTTGCGC |
| hoxb1a MO  | GGAAGTGTCCATACGCAATTAA    |
| hoxb1b MO  | AATTCATTGTTGACTGACCAAGCAA |

|         |                         |             |
|---------|-------------------------|-------------|
| cyp26c1 | Hernandez et al., 2007  | 4 ng/embryo |
| hoxb1a  | McClintock et al., 2002 | 4 ng/embryo |
| hoxb1b  | McClintock et al., 2002 | 4 ng/embryo |

#### gRNAs

| Name      | Sequence 5'-3'            |
|-----------|---------------------------|
| egr2b     | (GG)ATTCTGAGCTATCCAGTACGG |
| mBait     | GGCTGCTGCGGTTCCAGAGGTGG   |
| cyp26c1 1 | CCATGGATCCCTGCGGGAGTGGG   |
| cyp26c1 2 | GGCCAGCCCATGGATCCCTGCGG   |
| ephA4     | CCTGCGTGAAGCTTTCATCAGCC   |

| Target  | Reference  | Dose         |
|---------|------------|--------------|
| egr2b   | this study | 10 pg/embryo |
| mBait   | this study | 50 pg/embryo |
| cyp26c1 | this study | 32 pg/embryo |
| cyp26c1 | this study | 32 pg/embryo |
| ephA4   | this study | 32 pg/embryo |

#### gRNA oligos

| Name    | Sequence 5'-3'         |
|---------|------------------------|
| egr2b F | TAGGATTCTGAGCTATCCAGTA |
| egr2b R | AAACTACTGGATAGCTCAGAAT |
| mBait F | TAGGCTGCTGCGGTTCCAGAGG |
| mBait R | AAACCCTCTGGAACCGCAGCAG |

| Target |
|--------|
| egr2b  |
| egr2b  |
| mBait  |
| mBait  |

Target sequences for HCR detection of egr2b transcripts

Sequences 5'-3'

CTGACAGCTTTCCACATGTAACGCTTCGTGCGCGCGTTTCGCACAGACACAAC  
ATTCTGTGAACATCCGAGCGAGTGCTTCTTAGGACTTCACGATGACAGCTAA  
ACGGGGATATGAGCACGGAGAAGCGCGCCCTCGACTTAGCCTACTCCAGCAG  
GACCAGTGCCTGACGGACCCCGGCTACCCACAGCTTACACTCCGCAGAATTT  
GCATCTATTCGGTGGACGAGCTTGCCACAACACTGCCAGCCTCTGTGACTAT  
ATAACGATTTAGGAGGACATTACGAGCAGATAAACGCAGGAGATGGCCTGAT  
TCGCGCAACCAGCTGGCCCTCGCAACCAAACTTTTACCTACATGGGAAAGTT  
CCATCGACTCCCAGTACCCGGGAAACTGGAACCCAGAGGGCGTGATCAACAT  
AGTCGCATGCTGACTGACCCAAACGCACTTTGTTTGAATATTTAGGCCAATT  
CAAACCAAACCTTTCAAGGAGGTGTCTAACATCACTATTTTCTCCCATCGTCG  
ACTGTTATACATGTATTTGTTATGAAGTGACTAACGCGGGTCAATAATGTCC  
CTTTGGAGAAAAGCCCTGTGAGTCTCGGTGGCTTTGTGCACCCTCTTGCCGA  
TCTCATATCCTCCGCCATCCTACTCCTCTCAAAGCCAAACGCCGACTCTGG  
TGTTCCCTATAATCCCGGACTACGCCGGCTTTTTCCAACCTCCGTGCCAGAG  
AATTACCGCTCCTCTAACCCCTGAACACTATCAGGAACTTCACGCTAGG  
AGTTCGCGAGGAGCGACGAAAGAAAGAGACACCAAAATCCACCTGCGACA  
AAGAGCGAAAAGTCTCCTCGTCCACAGGAGTGTCAGCTCAGAGCGCGG  
TCGCCACGAGCATCTGCTCGTCCAGTTCAAACAGTGAACCTTCAACTGGAC  
TGCAATATCCAACACTATGTAGGCAATAACAATAATGCACCGTTCGTGTTTTA  
AAAACGGGTGGACTGATGAGGTGAAATCAAACCACAGTGCCAAACATGGAC

Target

egr2b

Reference

this study
